# Supplementary material for: Novel uridin-2′-yl carbamates: synthesis, incorporation into oligodeoxyribonucleotides, and remarkable fluorescence properties of 2′-pyren-1-ylmethylcarbamateElectronic supplementary information (ESI) available: Additional experimental data for compounds 3, 5 and 6. See http://www.rsc.org/suppdata/p1/b1/b111434b/
Source: Royal Society of Chemistry journal article supplement (doi:10.1039/b111434b), 2002-03-25
Supplement: b111434b.pdf [file b111434b.pdf]

## Electronic Supplementary Information

### **2'-O-(1,3,6,9,12-Pentaoxacyclopentadecan-2-ylmethyl)-aminocarbonyl-3',5'-O-(tetraisopropylidisiloxan-1,3-diyl)-uridine (3e).**

**Method B.** To the solution of **2**, prepared from 974 mg (2.0 mmol) of **1** and CDI (325 mg, 2.0 mmol) in DCM (5 cm<sup>3</sup>) 2-aminomethyl-15-crown-5 (514 mg, 2.0 mmol) was added under nitrogen. The mixture was allowed to react for 3 months at ambient temperature, then diluted with CHCl<sub>3</sub> (100 cm<sup>3</sup>), washed with water (100 cm<sup>3</sup>), 5% citric acid (100 cm<sup>3</sup>), and water (100 cm<sup>3</sup>), dried (Na<sub>2</sub>SO<sub>4</sub>), evaporated, and the residue was chromatographed on silica gel (stepwise gradient of 2→3→4→6→8→10% MeOH in CHCl<sub>3</sub>, v/v). Yield 679 mg (44.5%).

### **N $\alpha$ -[3',5'-O-(Tetraisopropylidisiloxan-1,3-diyl)uridin-2'-O-ylcarbonyl]-L-leucyl-L-phenylalaninamide (3f).**

**Method B.** To the solution of **2** (2.0 mmol), prepared in DCM (5 cm<sup>3</sup>), H-Leu-Phe-NH<sub>2</sub> hydrochloride (942 mg, 3.0 mmol) and DIEA (0.610 cm<sup>3</sup>, 3.5 mmol) were added under nitrogen. The mixture was allowed to react for 3 months at ambient temperature, then diluted with CHCl<sub>3</sub> (100 cm<sup>3</sup>), washed with water (100 cm<sup>3</sup>), 5% citric acid (100 cm<sup>3</sup>), and water (100 cm<sup>3</sup>), dried (Na<sub>2</sub>SO<sub>4</sub>), evaporated, and the residue was chromatographed on silica gel (stepwise gradient of 33→50% EtOAc in CHCl<sub>3</sub>, then 33→50% acetone in CHCl<sub>3</sub>-EtOAc (1:1), v/v). Yield 364 mg (23.0%).

### **2'-O-[4,9-bis(Trifluoroacetyl)-12-(trifluoroacetylamino)-4,9-diazadodecan-1-ylaminocarbonyl]-3',5'-O-(tetraisopropylidisiloxan-1,3-diyl)uridine (3p).**

**Method B.** The solution of **2** (2.904 g, 5.0 mmol) in dry DCM (50 cm<sup>3</sup>) was added dropwise to the stirred, ice-cooled solution of spermine (1.012 g, 5.0 mmol) in DCM (100 cm<sup>3</sup>) within 30 min. After 1 h the mixture was allowed to warm to 20°C, evaporated to dryness, coevaporated with THF (30 cm<sup>3</sup>), dissolved in dry THF (20 cm<sup>3</sup>), and *S*-ethyl trifluoroacetate (5.0 cm<sup>3</sup>, 39 mmol) was added in one portion. The mixture was kept overnight, evaporated to dryness (*STENCH!*) and the residue was chromatographed on silica gel (stepwise gradient of 0→5→10→15→20% acetone in CHCl<sub>3</sub>-EtOAc, 1:1, v/v/v). Compound **1** (526 mg, 21.6%) was eluted in the first fractions. The desired **3p** (white foam; 2.208 g, 44.0%) was eluted with 5→10% acetone (in CHCl<sub>3</sub>-EtOAc, 1:1 v/v). Further increase of the eluent polarity (15→20% acetone) gave the minor product, **1,12-bis[3',5'-O-(tetraisopropylidisiloxan-1,3-diyl)uridin-2'-O-ylcarbonylamino]-4,9-bis(trifluoroacetyl)-4,9-diazadodecane (3r)** as a white foam (1.147 g, 32.3%). *R*<sub>f</sub> 0.53 (EtOAc). MALDI-TOF (2,5-DHBA): [M+H]<sup>+</sup> calc. 1420.77, found 1421.18, [M+Na]<sup>+</sup> calc. 1442.75, found 1442.93, [M+K]<sup>+</sup> calc. 1458.86, found 1458.56. <sup>1</sup>H-NMR: 11.41 (s, 2H, *H*-3), 7.69 (d, 2H, *J*<sub>5,6</sub> = 8.0 Hz, *H*-6), 7.50, 7.44 (2 br. t, 2H, OCONH, rotamers), 5.65 (s, 2H, *H*-1'), 5.59 (d, 2H, *J*<sub>5,6</sub> = 8.0 Hz, *H*-5), 5.31 (m, 2H, *H*-2'), 4.49 (m, 2H, *H*-3'), 4.12–3.88 (m, 4H, *H*-5'), 3.83 (m, 2H, *H*-4'), 3.42–3.26 (m, 8H<sup>#</sup>, CH<sub>2</sub>NCH<sub>2</sub>), 2.98 (m, 4H, NHCH<sub>2</sub>), 1.85–1.60 (m, 4H, CH<sub>2</sub>CH<sub>2</sub>NH), 1.51 (m, 4H, CH<sub>2</sub>CH<sub>2</sub>CH<sub>2</sub>CH<sub>2</sub>), 1.08–0.80 (m, 56H, Pr<sup>r</sup>).

**5'-O-(4,4'-Dimethoxytrityl)-2'-O-(1,3,6,9,12-pentaoxa-cyclopentadecan-2-ylmethylaminocarbonyl)-uridine (5e).** The fast eluting compound, **3',5'-O,O'-bis(4,4'-dimethoxytrityl)-2'-O-(1,3,6,9,12-pentaoxacyclopentadecan-2-yl)methylaminocarbonyluridine** was isolated (293 mg, 13.0%); white amorphous solid, *R*<sub>f</sub> 0.36 (CHCl<sub>3</sub>-MeOH, 17:3). MALDI-TOF (2,4,6-THAP): [M+Na]<sup>+</sup> calc. 1147.22, found 1147.84, [M+K]<sup>+</sup> calc. 1163.33, found 1163.93. <sup>1</sup>H-NMR: 11.41 (s, 1H, *H*-3), 7.65 (m, 1H, OCONH), 7.50 (d, 1H, *J*<sub>5,6</sub> = 8.1 Hz, *H*-6), 7.29–7.10 (m, 18H, ArH), 6.86–6.72 (m, 8H, ArH), 6.08 (d, 1H, *J*<sub>1',2'</sub> = 6.1 Hz, *H*-1'), 5.35 (d, 1H, *J*<sub>5,6</sub> = 8.1 Hz, *H*-5), 5.02 (m, 1H, *H*-2'), 4.24 (m, 1H, *H*-4'), 3.71 (m, 12H, CH<sub>3</sub>), 3.67–3.39 (m, 21H<sup>#</sup>, *H*-5', CH(CH<sub>2</sub>OCH<sub>2</sub>)<sub>4</sub>CH<sub>2</sub>), 3.05 (m, 2H, CH<sub>2</sub>N), 2.87 (m, 1H, *H*-3').

**N $\alpha$ -[5'-O-(4,4'-Dimethoxytrityl)uridin-2'-O-ylcarbonyl]-L-leucyl-L-phenylalaninamide (5f).** Compound **3f** (593 mg, 0.75 mmol) was desilylated and tritylated according to general procedures. The desired product was purified by column chromatography on silica gel (stepwise gradient of 3→5→10% MeOH in CHCl<sub>3</sub>-acetone (2:1) + 0.5% Et<sub>3</sub>N (v/v/v)). Yield 485 mg (76.0%), white foam. *R*<sub>f</sub> 0.30 (acetone). MALDI-TOF MS (2,4,6-THAP): [M+Na]<sup>+</sup> calc. 872.35, found 872.62, [M+K]<sup>+</sup> calc. 888.32, found 888.62. <sup>1</sup>H-NMR: 11.45 (s, 1H, *H*-3), 7.90 (d, 1H, *J* = 8.4 Hz, NHCHCH<sub>2</sub>Ph), 7.72 (d, 1H, *J*<sub>5,6</sub> = 8.1 Hz, *H*-6), 7.48–7.10 (m, 17H, ArH, OCONH, NH<sub>2</sub>), 6.89 (d, 4H, *J* = 8.8 Hz, ArH), 5.90 (d, 1H, *J*<sub>1',2'</sub> = 4.4 Hz, *H*-1'), 5.52 (d, 1H, *J* = 5.9 Hz, 3'-OH), 5.43 (d, 1H, *J*<sub>5,6</sub> = 8.1 Hz, *H*-5), 5.13 (m, 1H, *H*-2'), 4.47 (m, 1H, CHCH<sub>2</sub>Ph), 4.37 (m, 1H, *H*-3'), 4.17 (m, 1H, CHBu<sup>t</sup>), 3.98 (m, 1H, *H*-4'), 3.73 (s, 6H, OCH<sub>3</sub>), 3.52–3.10 (m, 2H, *H*-5'), 3.05–2.70 (m, 2H, CH<sub>2</sub>Ph), 1.57–1.22 (m, 3H, CH<sub>2</sub>CHMe<sub>2</sub>), 0.86–0.69 (m, 6H, CH<sub>2</sub>CH(CH<sub>3</sub>)<sub>2</sub>).

**N $\alpha$ -[3'-O-(*N,N*-Diisopropylamino-2-cyanoethoxyphosphinyl)-5'-O-4,4'-dimethoxytrityluridin-2'-O-ylcarbonyl]-L-leucyl-L-phenylalaninamide (6f).** Chromatography: 50→100% acetone in CHCl<sub>3</sub>-EtOAc (1:1) + 1% Et<sub>3</sub>N (v/v/v). Yield 271 mg (51.6%), *R*<sub>f</sub> 0.13, 0.20. MALDI-TOF (2,6-DHAP-citrate): [M+H]<sup>+</sup> calc. 1051.15, found 1053.41, [M+Na]<sup>+</sup> calc. 1072.46, found 1071.67. <sup>1</sup>H-NMR: 11.47 (s, 1H, *H*-3), 8.08 (d, 2H, *J* = 11.7 Hz, NH<sub>2</sub>), 7.83 (d, 1H, *J* = 8.6 Hz, NHCHCH<sub>2</sub>Ph), 7.70 (d, 1H, *J*<sub>5,6</sub> = 8.1 Hz, *H*-6), 7.43–7.07 (m, 15H, ArH, OCONH), 6.88 (d, 4H, *J* = 8.8 Hz, ArH), 5.86 (d, 1H, *J*<sub>1',2'</sub> = 4.8 Hz, *H*-1'), 5.46 (d, 1H, *J*<sub>5,6</sub> = 7.8 Hz, *H*-5), 5.32 (t, 1H, *J* = 5.3 Hz, *H*-2'), 4.64 (m, 1H, CHCH<sub>2</sub>Ph), 4.46 (m, 1H, *H*-3'), 4.17 (m, 1H, CHBu<sup>t</sup>), 3.95 (m, 1H, *H*-4'), 3.73 (s, 6H, OCH<sub>3</sub>), 3.58–3.46 (m, 4H, POCH<sub>2</sub>, CHN), 3.04–2.99 (m, 2H, *H*-5'), 2.87–2.81 (m, 2H, CH<sub>2</sub>Ph), 2.59 (m, 2H, CH<sub>2</sub>CN), 1.23–0.98 (m, 12H, NCHCH<sub>3</sub>), 0.83–0.72 (m, 3H, CH<sub>2</sub>CHMe<sub>2</sub>), 0.65–0.59 (m, 6H, CH<sub>2</sub>CH(CH<sub>3</sub>)<sub>2</sub>). <sup>31</sup>P (DMSO-*d*<sub>6</sub>): 148.926.

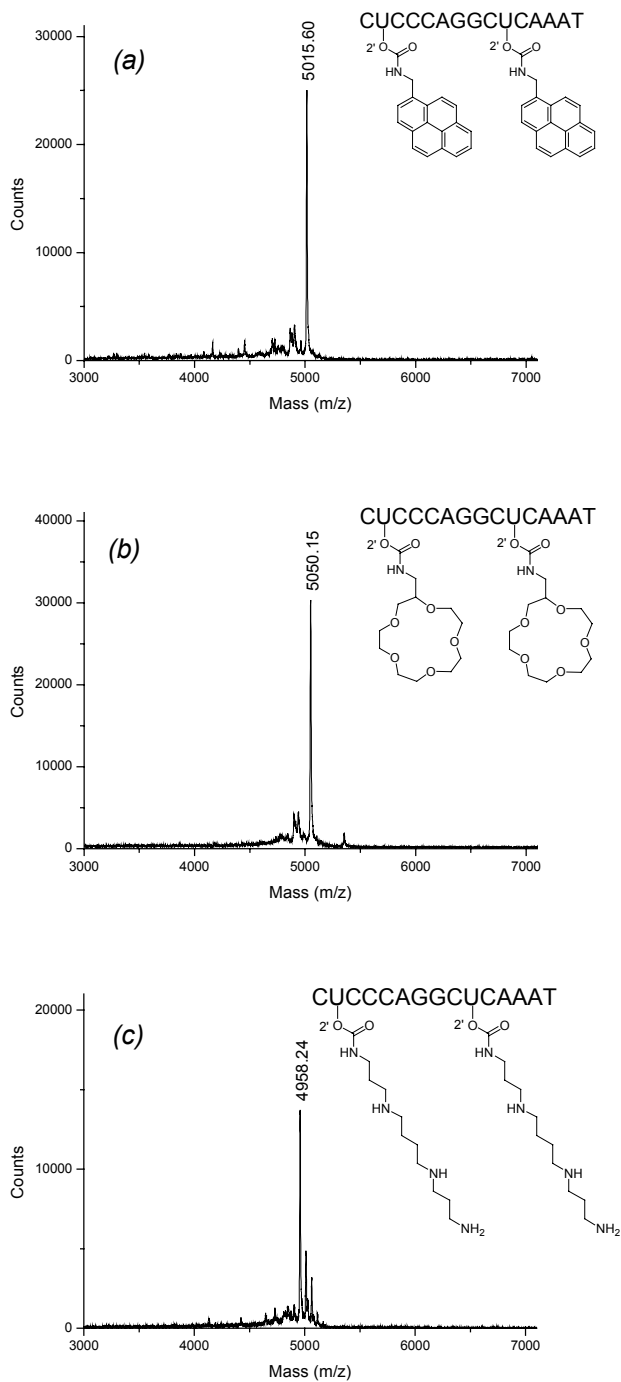

**Fig. 1** Examples of MALDI-TOF mass spectra of 2'-carbamate-modified oligonucleotides: *a*) bis-pyrene (ON26), *b*) bis-15-crown-5 (ON27), and *c*) bis-spermine (ON31).
